# Supplementary material
Source: Springer Nature journal article supplement (https://www.springermedizin.de/resource/supplementary/13075_2012_4385_MOESM6_ESM.pdf/10110298)
Supplement: MOESM6 [file 10110298]

## Identification of progressors by C1M

Table 2: Univariate correlation between clinical markers and baseline serum C1M.

|                         | Baseline (all) |         |     | $\Delta 24$ weeks (PBO) |       |     | $\Delta 24$ weeks (PBO w/o escape) |        |    | $\Delta 52$ weeks (PBO w/o escape) |        |    |
|-------------------------|----------------|---------|-----|-------------------------|-------|-----|------------------------------------|--------|----|------------------------------------|--------|----|
|                         | $\rho$         | P       | n   | $\rho$                  | P     | n   | $\rho$                             | P      | n  | $\rho$                             | P      | n  |
| <b>Age</b>              | -0.06          | ns      | 585 | -                       | -     | -   | -                                  | -      | -  | -                                  | -      | -  |
| <b>BMI</b>              | 0.01           | ns      | 578 | -                       | -     | -   | -                                  | -      | -  | -                                  | -      | -  |
| <b>Disease duration</b> | -0.01          | ns      | 584 | -                       | -     | -   | -                                  | -      | -  | -                                  | -      | -  |
| <b>Serum CRP</b>        | 0.80           | <0.0001 | 584 | -0.31                   | 0.001 | 112 | -0.31                              | 0.0023 | 93 | -0.36                              | 0.0007 | 83 |
| <b>VAS pain</b>         | 0.21           | <0.0001 | 578 | -0.08                   | ns    | 110 | -0.05                              | ns     | 91 | -0.00                              | ns     | 83 |
| <b>HAQ</b>              | 0.21           | <0.0001 | 535 | -0.17                   | ns    | 98  | -0.15                              | ns     | 82 | -0.11                              | ns     | 76 |
| <b>DAS28</b>            | 0.24           | <0.0001 | 573 | 0.09                    | ns    | 108 | 0.15                               | ns     | 89 | 0.11                               | ns     | 77 |
| <b>JSN</b>              | 0.12           | 0.0056  | 556 | 0.08                    | ns    | 153 | 0.16                               | ns     | 90 | 0.21                               | 0.055  | 84 |
| <b>mTSS</b>             | 0.14           | 0.0006  | 556 | 0.19                    | 0.017 | 153 | 0.28                               | 0.0084 | 90 | 0.34                               | 0.0017 | 84 |
| <b>ERN</b>              | 0.15           | 0.0003  | 556 | 0.19                    | 0.019 | 153 | 0.13                               | ns     | 90 | 0.21                               | 0.054  | 84 |

BMI: Body mass index. CRP: C-reactive protein. VAS pain: Visual analog scale of pain. HAQ: Health assessment questionnaire. DAS28: Disease activity score 28. JSN: Joint space narrowing. mTSS: modified total Sharp score. PBO: placebo group. Spearman rank correlation coefficient  $\rho$ , the P values and n are provided.
